# Supplementary material
Source: PubMed Central journal article supplement (PMC4948113)
Supplement: NIHMS799778-supplement-Supplemental_files.pdf [file NIHMS799778-supplement-Supplemental_files.pdf]

## Original article

Scand J Work Environ Health. 2016;42(4):329–337.

doi:10.5271/sjweh.3569

Improving safety climate through a communication and recognition program for construction: a mixed methods study <sup>1</sup>

by Emily H Sparer, ScD, Paul J Catalano, ScD, Robert F Herrick, ScD, Jack T Dennerlein, PhD <sup>2</sup>

*1 Supplemental Files*

*2 Correspondence to: Jack Dennerlein, Department of Physical Therapy, Bouvé College of Health Sciences, Northeastern University, 6 Robinson Hall, 360 Huntington Ave, Boston, MA 02115, USA. [E-mail: j.dennerlein@neu.edu]*

**Appendix A:** Safety climate questions and scoring, modified from Dedobbeleer and Béland (1991). Note that this is not the original order of the questions and that some response options have been changed from the original. The items here represent the safety climate scale used in the B-SAFE efficacy evaluation. Also included are the four items excluded from the B-SAFE analysis.

Safety climate scale;

1. How important do you think workers' safety practices are to this site's general contractor/construction management company?
  - a. 0 = Not at all important
  - b. 3.33 = Somewhat important
  - c. 6.67 = Very important
  - d. 10 = Extremely important
  
2. How much do supervisors and other top management seem to care about your safety?
  - a. 0 = None

- b. 2.5 = A little
- c. 5 = Some
- d. 7.5 = A good amount
- e. 10 = A great deal

3. How much emphasis does your immediate supervisor place on safety practices on the job?

- a. 0 = None
- b. 2.5 = A little
- c. 5 = Some
- d. 7.5 = A good amount
- e. 10 = A great deal

4. How often is the proper equipment for your tasks available at this worksite?

- a. 0 = Never
- b. 2.5 = Rarely
- c. 5 = Sometimes
- d. 7.5 = Usually
- e. 10 = Always

5. How much control do you feel you have over what happens to your safety on the job?

- a. 0 = None
- b. 2.5 = A little
- c. 5 = Some
- d. 7.5 = A good amount
- e. 10 = A great deal

Additional items not included in B-SAFE analysis:

6. When you started at this worksite, were you given instructions on the safety policy and safety requirements of this site's general contractor/construction management company
  - a. 0 = No
  - b. 10 = Yes
7. How often are job safety meetings held at this worksite?
  - a. 0 = Never
  - b. 2.5 = Only when there had been an accident
  - c. 5 = Once a week
  - d. 7.5 = Several times a week
  - e. 10 = Everyday
8. How often do you feel you have to take risks to get the job done?
  - a. 0 = Always
  - b. 2.5 = Usually
  - c. 5 = Sometimes
  - d. 7.5 = Rarely
  - e. 10 = Never
9. How likely do you think it is that you might be injured on the job in the next 12 months?
  - a. 0 = Very likely
  - b. 3.33 = Somewhat likely
  - c. 6.67 = Not very likely
  - d. 10 = Not at all likely
